# Supplementary figures and images for: Study on carbon-induced signal enhancement in inductively coupled plasma mass spectrometry: an approach from the spatial distribution of analyte signal intensities
Source: Royal Society of Chemistry journal article supplement (doi:10.1039/c9ja00152b), 2019-01-01

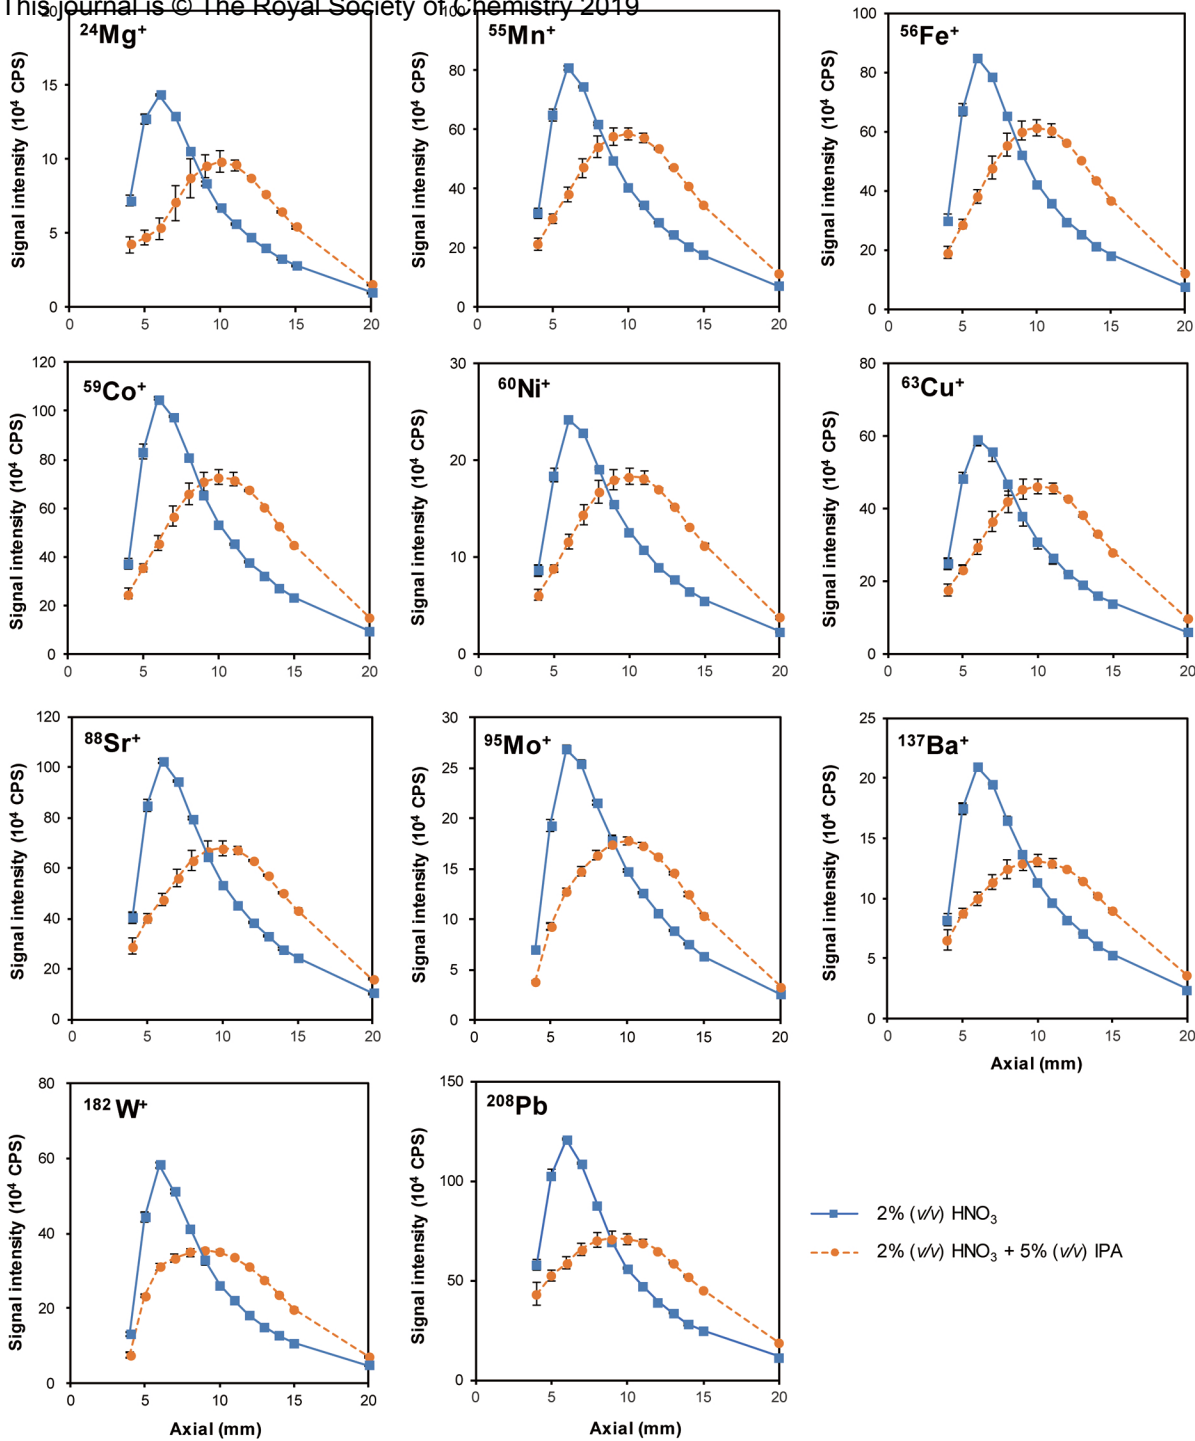

Supplement: c9ja00152b2.pdf [file c9ja00152b2.pdf]
